# Supplementary material for: Patient stratification in clinical glaucoma trials using the individual tear proteome
Source: PubMed Central journal article supplement (PMC6089987; doi:10.1038/s41598-018-30369-x), 2018-08-13
Supplement: 41598_2018_30369_MOESM1_ESM.pdf [file 41598_2018_30369_MOESM1_ESM.pdf]

1 Patient stratification in clinical glaucoma trials using the individual tear proteome

2 Janika Nättinen, Antti Jylhä, Ulla Aapola, Minna Parkkari, Alexandra Mikhailova, Roger W  
3 Beuerman, Hannu Uusitalo

4

5 Supplementary Tables

6 **Supplementary Table S1.** IPA pathway analysis of the protein clusters and top 10 diseases or  
7 function annotations with the lowest p-values.

|                                               | Diseases or Functions Annotation      | P <sup>a</sup> |
|-----------------------------------------------|---------------------------------------|----------------|
| Cluster 1                                     | psoriasis                             | 2.65E-13       |
|                                               | metabolism of protein                 | 1.45E-12       |
|                                               | cell death of tumor cell lines        | 5.85E-12       |
|                                               | catabolism of protein                 | 1.33E-11       |
|                                               | Rheumatic Disease                     | 2.17E-11       |
|                                               | necrosis                              | 8.45E-11       |
|                                               | amyloidosis                           | 2.90E-10       |
|                                               | aggregation of cells                  | 4.44E-10       |
|                                               | cell death                            | 5.62E-10       |
|                                               | adhesion of blood cells               | 6.80E-10       |
| Cluster 2<br>- chosen for further<br>analysis | inflammation of organ                 | 7.23E-12       |
|                                               | psoriasis                             | 1.88E-11       |
|                                               | cell death                            | 1.62E-09       |
|                                               | Dermatitis                            | 8.67E-09       |
|                                               | atopic dermatitis                     | 1.44E-08       |
|                                               | allergy                               | 2.34E-08       |
|                                               | cell death of tumor cells             | 1.31E-07       |
|                                               | invasion of cells                     | 1.53E-07       |
|                                               | metastasis                            | 1.74E-07       |
|                                               | hypersensitive reaction               | 3.13E-07       |
| Cluster 3<br>- chosen for further<br>analysis | cell death                            | 2.09E-16       |
|                                               | cell movement                         | 6.17E-16       |
|                                               | cellular infiltration                 | 2.46E-13       |
|                                               | allergy                               | 1.91E-12       |
|                                               | inflammation of organ                 | 2.34E-12       |
|                                               | neuromuscular disease                 | 2.69E-12       |
|                                               | apoptosis                             | 7.47E-12       |
|                                               | necrosis                              | 8.17E-12       |
|                                               | metabolism of reactive oxygen species | 2.30E-11       |
|                                               | chronic fatigue syndrome              | 3.00E-11       |
| Cluster 4                                     | amyloidosis                           | 2.44E-07       |
|                                               | activation of neutrophils             | 3.41E-07       |

|                               |                                                           |          |
|-------------------------------|-----------------------------------------------------------|----------|
| - chosen for further analysis | chronic inflammatory disorder                             | 1.21E-06 |
|                               | aplastic anemia                                           | 2.12E-06 |
|                               | cell death                                                | 4.29E-06 |
|                               | chronic psoriasis                                         | 6.61E-06 |
|                               | Alzheimer's disease                                       | 6.91E-06 |
|                               | chronic inflammatory demyelinating polyradiculoneuropathy | 1.08E-05 |
|                               | rheumatoid arthritis                                      | 1.40E-05 |
|                               | complement component deficiency                           | 1.61E-05 |
| Cluster 5                     | cell death of tumor cell lines                            | 1.37E-11 |
|                               | cell death                                                | 1.12E-08 |
|                               | synthesis of reactive oxygen species                      | 2.39E-08 |
|                               | generation of reactive oxygen species                     | 3.89E-08 |
|                               | necrosis                                                  | 1.35E-07 |
|                               | apoptosis of tumor cell lines                             | 2.51E-07 |
|                               | advanced non-small-cell lung carcinoma                    | 2.72E-07 |
|                               | growth of yeast                                           | 4.74E-07 |
|                               | metastasis                                                | 6.22E-07 |
|                               | cell movement                                             | 1.96E-06 |
| Cluster 6                     | Viral Infection                                           | 1.62E-07 |
|                               | synthesis of protein                                      | 1.81E-06 |
|                               | cell death of osteosarcoma cells                          | 2.71E-06 |
|                               | synthesis of nucleoside diphosphate sugar                 | 1.48E-05 |
|                               | Baraitser-Winter syndrome                                 | 2.06E-05 |
|                               | movement of duct cancer cell lines                        | 2.06E-05 |
|                               | metabolism of protein                                     | 2.20E-05 |
|                               | organization of cytoskeleton                              | 2.54E-05 |
|                               | modification of hydrogen peroxide                         | 2.55E-05 |
|                               | organization of cytoplasm                                 | 3.90E-05 |
| Cluster 7                     | psoriasis                                                 | 5.20E-08 |
|                               | Viral Infection                                           | 5.30E-08 |
|                               | allergy                                                   | 2.43E-07 |
|                               | endocytosis                                               | 1.14E-06 |
|                               | atopic dermatitis                                         | 1.46E-06 |
|                               | immediate hypersensitivity                                | 2.21E-06 |
|                               | Dermatitis                                                | 3.03E-06 |
|                               | metabolism of protein                                     | 3.09E-06 |
|                               | cell death                                                | 3.46E-06 |
|                               | catabolism of protein                                     | 6.62E-06 |

8 <sup>a</sup>Fisher's Exact Test (IPA's default)

9

10

11 **Supplementary Table S2.** Proteins separating the three patient groups from each other based on their  
 12 baseline expression values.

| Uniprot | Full name                                                           | Symbol       | Means of groups (log <sub>2</sub> ) |       |       | P between groups <sup>a</sup> |        |        |
|---------|---------------------------------------------------------------------|--------------|-------------------------------------|-------|-------|-------------------------------|--------|--------|
|         |                                                                     |              | C1                                  | C2    | C3    | C1-C2                         | C1-C3  | C2-C3  |
| P02787  | Serotransferrin                                                     | TF           | 23.35                               | 20.84 | 20.40 | <0.001                        | <0.001 | 0.34   |
| P01036  | Cystatin-S                                                          | CST4         | 20.59                               | 22.79 | 23.29 | <0.001                        | <0.001 | 0.10   |
| P11142  | Heat shock cognate<br>71 kDa protein                                | HSPA8        | 20.02                               | 19.25 | 19.08 | <0.001                        | <0.001 | 0.33   |
| Q96KP4  | Cytosolic non-<br>specific dipeptidase                              | CNDP2        | 19.93                               | 19.04 | 18.69 | <0.001                        | <0.001 | 0.07   |
| P62258  | 14-3-3 protein<br>epsilon                                           | YWHAE        | 18.72                               | 17.78 | 17.43 | <0.001                        | <0.001 | 0.02   |
| P00390  | Glutathione<br>reductase,<br>mitochondrial                          | GSR          | 19.60                               | 18.04 | 17.64 | <0.001                        | <0.001 | 0.20   |
| P01037  | Cystatin-SN                                                         | CST1         | 19.21                               | 21.26 | 21.97 | <0.001                        | <0.001 | 0.06   |
| P11021  | 78 kDa glucose-<br>regulated protein                                | HSPA5        | 17.51                               | 16.77 | 16.58 | <0.001                        | <0.001 | 0.22   |
| Q99935  | Proline-rich protein<br>1                                           | PROL1        | 16.26                               | 19.82 | 20.56 | <0.001                        | <0.001 | 0.23   |
| P63104  | 14-3-3 protein<br>zeta/delta                                        | YWHAZ        | 20.30                               | 19.83 | 19.30 | 0.04                          | <0.001 | 0.01   |
| P07737  | Profilin-1                                                          | PFN1         | 17.55                               | 19.48 | 19.03 | <0.001                        | <0.001 | 0.04   |
| P13489  | Ribonuclease<br>inhibitor                                           | RNH1         | 16.59                               | 16.35 | 15.55 | 0.33                          | 0.01   | <0.001 |
| P61769  | Beta-2-<br>microglobulin                                            | B2M          | 15.16                               | 17.60 | 18.28 | <0.001                        | <0.001 | 0.14   |
| P06703  | Protein S100-A6                                                     | S100A6       | 20.45                               | 18.23 | 17.69 | <0.001                        | <0.001 | 0.16   |
| P60660  | Myosin light<br>polypeptide 6                                       | MYL6         | 18.34                               | 16.83 | 16.31 | <0.001                        | <0.001 | 0.12   |
| P09228  | Cystatin-SA                                                         | CST2         | 19.50                               | 21.46 | 21.95 | <0.001                        | <0.001 | 0.18   |
| P07108  | Acyl-CoA-binding<br>protein                                         | DBI          | 18.02                               | 16.35 | 16.90 | <0.001                        | 0.02   | 0.02   |
| P31949  | Protein S100-A11                                                    | S100A11      | 14.61                               | 18.09 | 17.65 | <0.001                        | <0.001 | 0.36   |
| O15145  | Actin-related protein<br>2/3 complex subunit<br>3                   | ARPC3        | 10.11                               | 14.35 | 13.49 | <0.001                        | <0.001 | 0.09   |
| Q12765  | Secernin-1                                                          | SCRN1        | 13.41                               | 14.76 | 14.30 | <0.001                        | 0.07   | 0.06   |
| P15374  | Ubiquitin carboxyl-<br>terminal hydrolase<br>isozyme L3             | UCHL3        | 14.70                               | 13.07 | 11.74 | <0.001                        | 0.01   | 0.02   |
| P68402  | Platelet-activating<br>factor<br>acetylhydrolase IB<br>subunit beta | PAFAH1<br>B2 | 12.56                               | 15.35 | 14.58 | <0.001                        | <0.001 | 0.01   |

13 <sup>a</sup>Pairwise Welch's one-way analysis of variance (ANOVA)

14 **Supplementary Table S3.** Linear relationships between the baseline stratifying proteins and  
 15 clinical signs.

| Clinical sign         | Uniprot | Full name                                        | Symbol | Coefficients |                                        | P <sup>a</sup> |        |
|-----------------------|---------|--------------------------------------------------|--------|--------------|----------------------------------------|----------------|--------|
|                       |         |                                                  |        | Intercept    | protein expression (log <sub>2</sub> ) | unadj.         | adj.   |
| Schirmer's test as DV | P62258  | 14-3-3 protein epsilon                           | YWHAE  | 136.584      | -6.764                                 | <0.001         | <0.001 |
|                       | P13489  | Ribonuclease inhibitor                           | RNH1   | 119.600      | -6.454                                 | <0.001         | <0.001 |
|                       | P11142  | Heat shock cognate 71 kDa protein                | HSPA8  | 132.799      | -6.042                                 | <0.001         | <0.001 |
|                       | P63104  | 14-3-3 protein zeta/delta                        | YWHAZ  | 131.371      | -5.866                                 | <0.001         | <0.001 |
|                       | P00390  | Glutathione reductase, mitochondrial             | GSR    | 105.298      | -4.909                                 | <0.001         | <0.001 |
|                       | P11021  | 78 kDa glucose-regulated protein                 | HSPA5  | 97.092       | -4.802                                 | <0.001         | <0.001 |
|                       | P60660  | Myosin light polypeptide 6                       | MYL6   | 95.605       | -4.702                                 | <0.001         | <0.001 |
|                       | P02787  | Serotransferrin                                  | TF     | 88.786       | -3.439                                 | <0.001         | <0.001 |
|                       | P06703  | Protein S100-A6                                  | S100A6 | 68.254       | -2.849                                 | <0.001         | <0.001 |
|                       | P07108  | Acyl-CoA-binding protein                         | DBI    | 53.620       | -2.228                                 | 0.007          | 0.01   |
|                       | P15374  | Ubiquitin carboxyl-terminal hydrolase isozyme L3 | UCHL3  | 38.406       | -1.713                                 | 0.002          | 0.003  |
|                       | P01036  | Cystatin-S                                       | CST4   | -24.043      | 1.772                                  | 0.002          | 0.003  |
|                       | P09228  | Cystatin-SA                                      | CST2   | -34.424      | 2.365                                  | <0.001         | <0.001 |
|                       | P61769  | Beta-2-microglobulin                             | B2M    | -25.904      | 2.396                                  | <0.001         | <0.001 |
|                       | P01037  | Cystatin-SN                                      | CST1   | -39.967      | 2.645                                  | <0.001         | <0.001 |
|                       | Q99935  | Proline-rich protein 1                           | PROL1  | -35.713      | 2.683                                  | <0.001         | <0.001 |
| FTBUT as DV           | P11142  | Heat shock cognate 71 kDa protein                | HSPA8  | 69.072       | -3.181                                 | <0.001         | 0.010  |
|                       | P63104  | 14-3-3 protein zeta/delta                        | YWHAZ  | 42.423       | -1.769                                 | 0.002          | 0.018  |
|                       | P00390  | Glutathione reductase, mitochondrial             | GSR    | 33.930       | -1.445                                 | 0.001          | 0.016  |
|                       | P02787  | Serotransferrin                                  | TF     | 27.844       | -0.954                                 | 0.003          | 0.019  |

16 DV, dependent variable; FTBUT, fluorescein tear break-up time

17 <sup>a</sup>Mixed model regression

18

19

20

21

## 22 Supplementary methods

### 23 **Denaturation, alkylation, reduction and tryptic digestion**

24 Proteins were solubilized in 2% sodium dodecylsulfate (SDS) and reduced by 50 mM Tris-(2-  
25 carboxyethyl) phosphine (TCEP) for 60 min at +60°C. Samples were then transferred into 30 kDa  
26 molecular weight cut-off filters (Pall Corporation, Port Washington, New York, USA) and flushed  
27 two times with 8 M urea in 50 mM Tris-HCl (Merck KgaA, Darmstadt, Germany). Cysteine residues  
28 were blocked by iodoacetamide (IAA) at room temperature in the dark. Alkylation was terminated  
29 by centrifugation and the samples were flushed three times with urea solution. Three subsequent  
30 rinses with digestion buffer were performed prior to digestion with trypsin (Sciex, Framingham, MA,  
31 USA) for 16 h at +37°C at a trypsin-to-protein ratio of 1:25. Digests were dried in a speed vacuum  
32 concentrator and desalted with Pierce C18 tips (Thermo Fisher Scientific) according to  
33 manufacturer's instructions. After clean up the samples were once more vacuum dried and stored at  
34 -20°C until reconstituted to loading solution (5% ACN, 0.1% FA) at equal concentrations. Hyper  
35 reaction monitoring (HRM) peptide mix (Biognosys, Zurich, Switzerland) was added to each sample  
36 before sequential window acquisition of all theoretical fragment ion spectra (SWATH) analysis. All  
37 reagents were purchased from Sigma-Aldrich (St. Louis, MO, USA) unless otherwise stated. Two  
38 replicate MS analyses were performed from each sample.

### 39 **NanoLC-TripleTOF**

40 Digested peptides were analysed using Eksigent 425 NanoLC coupled with high speed TripleTOF  
41 5600+ mass spectrometer (Ab Sciex, Concord, Canada). A capillary RP-LC column (cHiPLC  
42 ChromXP C18-CL, 3 µm particle size, 120 Å, 75 µm i.d × 15 cm, Eksigent Concord, Canada) was  
43 used for liquid chromatography separation of peptides. Samples were first loaded into trap column  
44 (cHiPLC ChromXP C18-CL, 3 µm particle size, 120 Å, 75 µm i.d × 5 mm) from autosampler and  
45 flushed for 10 min at 2 µl/min (2% ACN, 0.1% FA). The flush system was then switched to line with

46 analytical column. Tear samples were analysed with 120 min 6 step gradient using eluent A: 0.1%  
47 FA in 1% ACN and eluent B: 0.1% FA in ACN (eluent B from 5% to 7% over 2 min, 7% to 24%  
48 over 55 min, 24% to 40% over 29 min, 40% to 60% over 6 min, 60% to 90% over 2 min and kept at  
49 90% for 15 min, 90% to 5% over 0.1 min and kept at 5% for 13 min) at 300 nl/min.

50 Key parameters for the mass spectrometer in SWATH ID library analysis were: ion spray voltage  
51 floating (ISVF) 2300 V, curtain gas (CUR) 30, interface heater temperature (IHT) +125°C, ion  
52 source gas 1 13, declustering potential (DP) 100 V. Library for SWATH analysis was created from  
53 the same samples by information dependent-acquisition (IDA) method and relative quantitation  
54 analysis was done by SWATH method. All methods were controlled by Analyst TF 1.5 software  
55 (Ab Sciex, USA). For IDA parameters, 0.25 s MS survey scan in the mass range 350-1250 m/z  
56 followed by 60 MS/MS scans in the mass range of 100-1500 Da (total cycle time 3.302 s).

57 Switching criteria were set to ions with mass to charge ratio ( $m/z$ ) greater than 350 and smaller than  
58 1250 ( $m/z$ ), with charge state 2-5 and an abundance threshold of more than 120 counts. Exclusion  
59 of former target ions was set for 12 s. IDA rolling collision energy (CE) parameters script was set  
60 for automatically controlling CE. SWATH quantification analysis parameters were the same as for  
61 SWATH ID, with the following exceptions: cycle time 3.332 s and MS parameters set to 15 Da  
62 windows with 1 Da overlap between mass range 350-1250 Da followed by 40 MS/MS scans in the  
63 mass range of 100-1500 Da.

64
